# Supplementary material for: The Mycorrizal Status in Vineyards Affected by Esca
Source: MDPI journal article supplement (doi:10.3390/jof7100869), 2021-10-16
Supplement: s1 [file s1]

**Supplementary Figure S1** – Symptoms taken into account for the esca disease classification on Verdicchio cultivar. Leaves presented the tiger-striped pattern, with a typical yellow band between the green and necrotic tissues (left) and plant with portion of the canopy and clusters desiccated (central). On the right, canopy of a healthy plant.

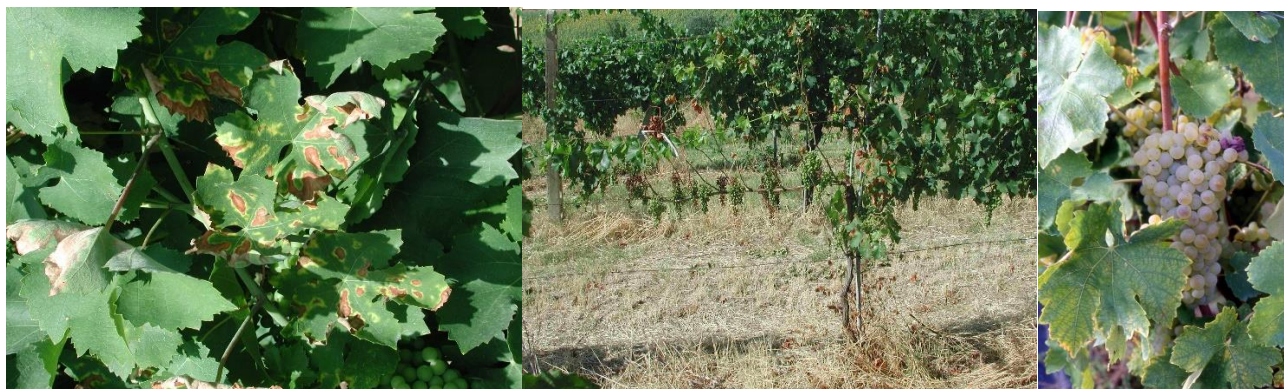

**Supplementary Figure S2** – Sequence similarity searches using NCBI Blast web site of AMF *R. irregularis* and *F. mosseae* qPCR fragments. (a), Blast alignment according 28SRNA gene of sample S1\_V1 (NCBI accession number, MK513942) and S5\_V3 (MK513943) showing high nucleotide similarity to *R. irregularis* species (HF968988.1 and FJ235574.1), (b) Blast alignment of according to LSU gene of sample S4\_V1 (MK513940) and S10\_V3 (MK513941) homologous to *F. mosseae* species (FN377862.2 and FN37865.1).

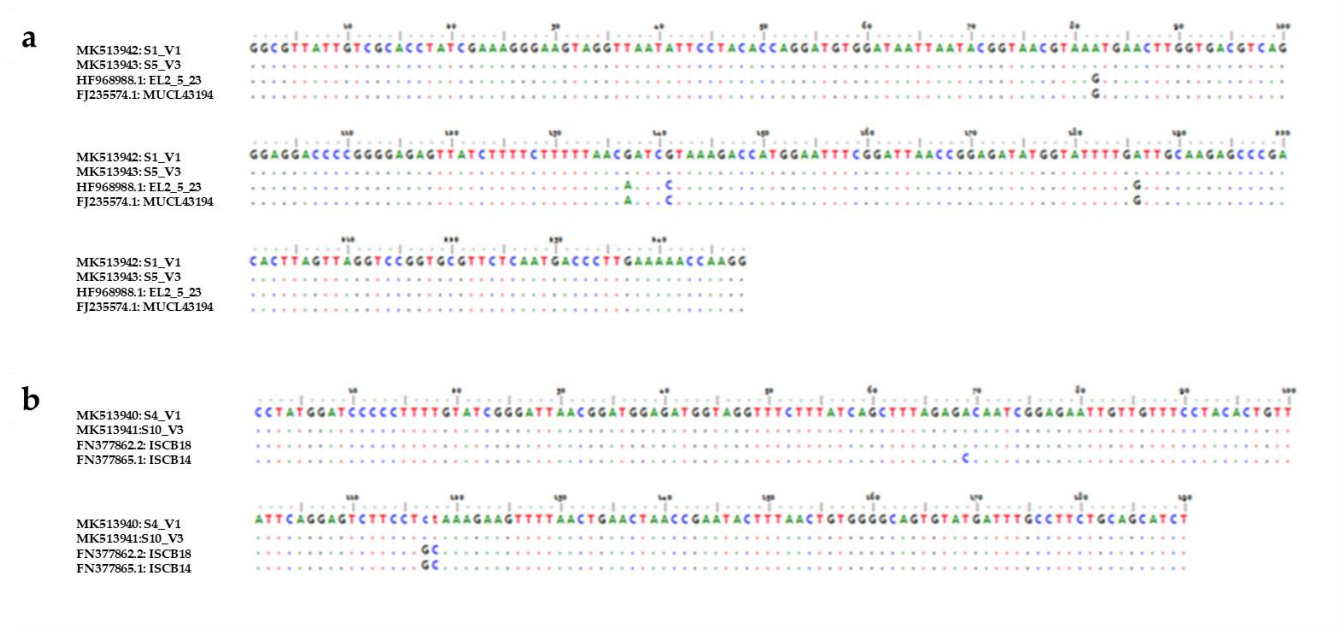

**Supplementary Table S1** - Serial dilutions of DNA from I10 and A7 samples analyzed on qPCR for *R. irregularis* and *F. mosseae* genes. The experiments were assessed in triplicate over three independent experiments (n = 9). Cq, quantification cycle; SD, standard deviation; \*less of four replicates amplified of six performed; na, not amplified

|                       |        | qPCR                          |    |                 |                 |
|-----------------------|--------|-------------------------------|----|-----------------|-----------------|
|                       |        | DNA from grapevine roots (ng) |    |                 |                 |
|                       | sample | 100                           | 50 | 5               | 0.5             |
|                       |        | Cq mean $\pm$ SD              |    |                 |                 |
| <i>R. irregularis</i> | I10    | na                            | na | 29.6 $\pm$ 0.3  | 33.6 $\pm$ 1.2* |
|                       | A7     | na                            | na | 30.2 $\pm$ 0.5  | 35.1 $\pm$ *    |
| <i>F. mosseae</i>     | I10    | na                            | na | 31.2 $\pm$ 1.1* | na              |
|                       | A7     | na                            | na | 33.9 $\pm$ 1.1* | 36.1 $\pm$ *    |

**Supplementary Table S2** - The ddPCR inhibitors investigation and LOD for AMF. Non host roots from oak plants (0, and 50 ng/qPCR reaction) spiked with serial dilutions of AMF qPCR fragments (S1\_V1 and S10\_V3 for *R. irregularis* and *F. mosseae*, respectively) at different concentration. The test was assessed on two independent experiments (n = 2).

| ddPCR                 |                                                         |                                                   |                |
|-----------------------|---------------------------------------------------------|---------------------------------------------------|----------------|
|                       | AMF qPCR fragments from grapevine roots (ng/reaction) + | DNA from oak non-host plant                       |                |
|                       |                                                         | 0 ng/reaction                                     | 50 ng/reaction |
|                       |                                                         | Concentration (copies/20 L reaction)<br>Mean ± SD |                |
| <i>R. irregularis</i> | $3.5 \times 10^{-8}$                                    | 2,940 ± 84.1                                      | 2,380 ± 90.5   |
|                       | $3.5 \times 10^{-9}$                                    | 270 ± 32                                          | 216 ± 34       |
|                       | $3.5 \times 10^{-10}$                                   | 38 ± 4.1                                          | 24 ± 7.1       |
|                       | $3.5 \times 10^{-11}$                                   | 10 ± 3.3                                          | 8 ± 3.5        |
| <i>F. mosseae</i>     | $2.8 \times 10^{-8}$                                    | 3,020 ± 58.3                                      | 2,800 ± 68.3   |
|                       | $2.8 \times 10^{-9}$                                    | 364.2 ± 14                                        | 424 ± 19       |
|                       | $2.8 \times 10^{-10}$                                   | 30 ± 9.0                                          | 56 ± 12        |
|                       | $2.8 \times 10^{-11}$                                   | 5.6 ± 1.1                                         | 9.4 ± 21       |

**Supplementary Table S3** - Serial dilutions of DNA from I10 and A7 samples analyzed on ddPCR with the primers for *R. irregularis* gene and LSU *F. mosseae* genes. The test was assessed over two independent experiments (n = 2). SD, standard deviation; na, not amplified.

| qqPCR                         |     |     |             |            |            |
|-------------------------------|-----|-----|-------------|------------|------------|
| DNA from grapevine roots (ng) |     |     |             |            |            |
| sample                        |     | 100 | 50          | 5          | 0.5        |
| Concentration (copies/20µL)   |     |     |             |            |            |
| <i>R. irregularis</i>         | I10 | na  | 706 ± 80.4  | 101 ± 21.1 | 9 ± 2.1    |
|                               | A7  | na  | 105.4± 21.7 | 12.4 ± 6.1 | 2.2 ± 1.8  |
| <i>F. mosseae</i>             | I10 | na  | 36 ± 2.82   | 4.6 ± 2.1  | 1.4 ± 0.04 |
|                               | A7  | na  | 50.4 ± 10.7 | 6.4 ± 3.1  | 1.2 ± 1.1  |
